# Supplementary material for: Aryl amine substituted low energy gap carbazole polymers: preparation and photovoltaic properties
Source: Royal Society of Chemistry journal article supplement (doi:10.1039/c0jm01335h), 2010-01-01
Supplement: c0jm01335h.pdf [file c0jm01335h.pdf]

## Aryl Amine Substituted Low Energy Gap Carbazole Polymers: Preparation and Photovoltaic Properties

David Mohamad,<sup>b</sup> Richard G. Johnson,<sup>a</sup> Dainius Janeliunas,<sup>a</sup> Mindaugas Kirkus,<sup>a</sup> Hunan Yi,<sup>a</sup> David G. Lidzey\*<sup>b</sup> and Ahmed Iraqi\*<sup>a</sup>

<sup>a</sup> Department of Chemistry, University of Sheffield, Sheffield S3 7HF, United Kingdom,

<sup>b</sup> Department of Physics and Astronomy, University of Sheffield, Sheffield S3 7RH, United Kingdom.

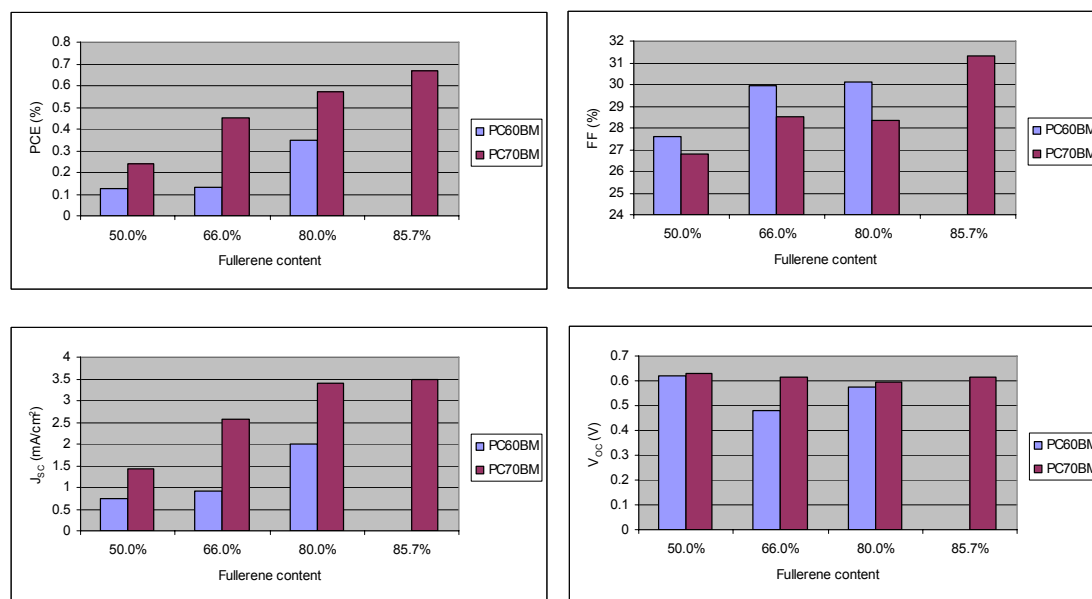

**Figure S1** Effect of fullerene weight concentration on the performance metrics of **P2**/Fullerene blend devices cast from Chlorobenzene and heat treated at 130°C for 10 minutes. Devices were characterised under 1 Sun simulated AM1.5 solar irradiation.

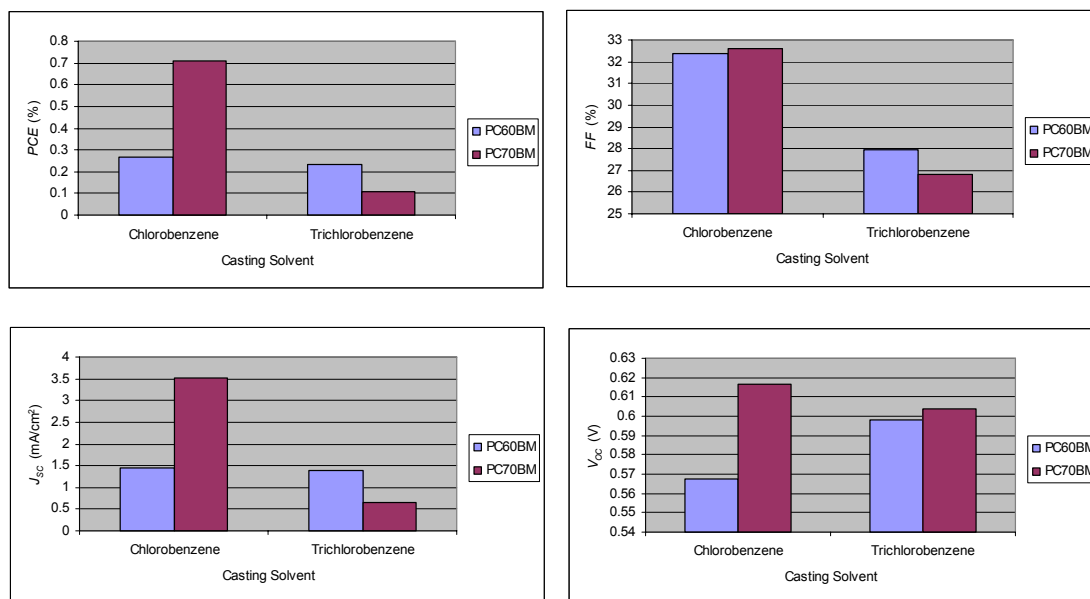

**Figure S2** Effect of casting solvent on the performance metrics on 1:4 P2/Fullerene blend devices after heat treatment for 5 minutes at 150°C. Devices were characterised under 1 Sun simulated AM1.5 solar irradiation.

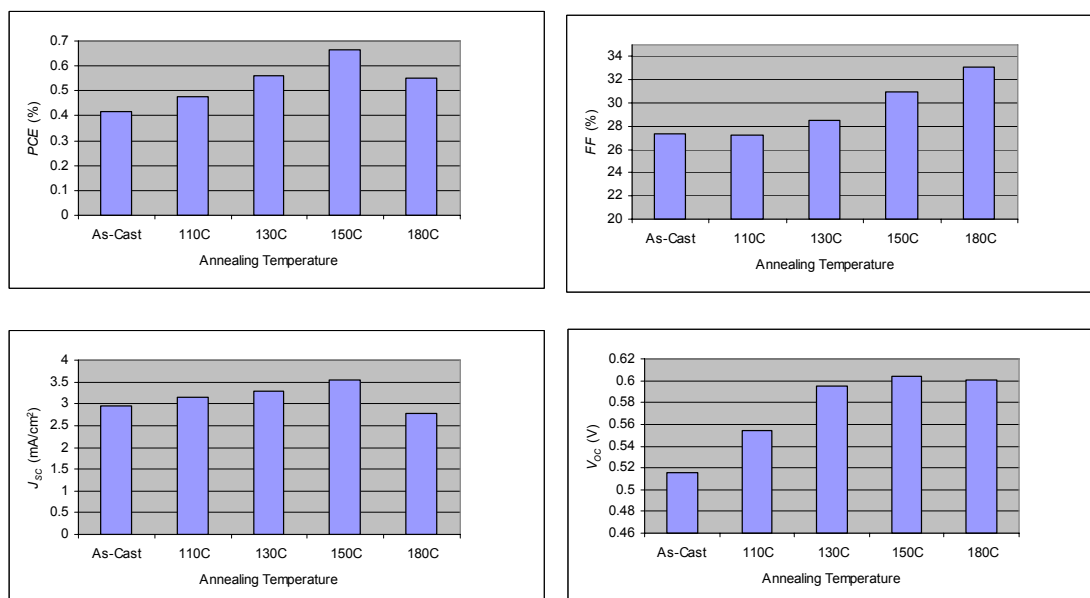

**Figure S3** Effect of thermal annealing temperature on the performance metrics on 1:4 P2/PC<sub>70</sub>BM blend devices. All devices were annealed for 30 minutes at the stated

temperature. Devices were characterised under 1 Sun simulated AM1.5 solar irradiation.
